# Supplementary material
Source: Springer Nature journal article supplement (https://www.springermedizin.de/resource/supplementary/13049_2011_268_MOESM5_ESM.pdf/9666224)

## IDENTIFICATION

Records identified through  
MEDLINE database search  
**4880**

Additional records identified  
through reference lists of selected  
papers **59**

## SCREENING

Records screened  
**4939**

Records excluded  
**4796**

## ELIGIBILITY

Full-text studies assessed  
for eligibility  
**143**

Full-text studies excluded,  
with reasons  
**129**

## INCLUDED

Studies included in  
qualitative synthesis  
**14**

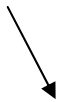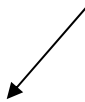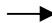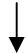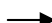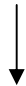

Supplement: MOESM5 [file 9666224]
